# Supplementary material for: Correction: Tackling the Tibetan Plateau in a down suit: insights into thermoregulation by bar-headed geese during migration
Source: Oxford University Press journal article supplement (doi:10.1242/jeb.226639), 2020-08-01
Supplement: jeb226639supp2.pdf [file jeb226639supp2.pdf]

**Supplementary tables**

|     |                 |                      |                           | Rayleigh's test of uniformity |         | Watson William's test between during and outside of migration |         |
|-----|-----------------|----------------------|---------------------------|-------------------------------|---------|---------------------------------------------------------------|---------|
|     | Goose           | Stage of year        | Median Time of peak $T_b$ | Rho                           | P Value | F (d.f.)                                                      | P Value |
| (A) | All data        |                      |                           |                               |         |                                                               |         |
|     | A               | During migration     | 02:41                     | 0.506                         | <0.001  | 32.947 (1,64)                                                 | <0.001  |
|     |                 | Outside of migration | 11:53                     | 0.301                         | 0.011   |                                                               |         |
|     | B               | During migration     | 01:57                     | 0.462                         | <0.001  | 141.967 (1,63)                                                | <0.001  |
|     |                 | Outside of migration | 12:36                     | 0.479                         | <0.001  |                                                               |         |
|     | C               | During migration     | 07:36                     | 0.341                         | <0.001  | 6.945 (1,112)                                                 | 0.01    |
|     |                 | Outside of migration | 10:31                     | 0.216                         | 0.037   |                                                               |         |
|     | D               | During migration     | 00:13                     | 0.305                         | <0.001  | 45.057 (1,113)                                                | <0.001  |
|     |                 | Outside of migration | 07:05                     | 0.314                         | <0.001  |                                                               |         |
|     | E               | During migration     | 02:43                     | 0.378                         | <0.001  | 36.343 (1,88)                                                 | <0.001  |
|     |                 | Outside of migration | 16:13                     | 0.327                         | 0.025   |                                                               |         |
|     | F               | During migration     | 00:48                     | 0.206                         | 0.04    | 51.418 (1,105)                                                | <0.001  |
|     |                 | Outside of migration | 09:16                     | 0.425                         | <0.001  |                                                               |         |
|     | G               | During migration     | 02:32                     | 0.308                         | 0.001   | 91.975 (1,105)                                                | <0.001  |
|     |                 | Outside of migration | 14:25                     | 0.333                         | <0.001  |                                                               |         |
| (B) | Stationary days |                      |                           |                               |         |                                                               |         |
|     | A               | During migration     | 01:04                     | 0.387                         | 0.09    | 39.486 (1,41)                                                 | <0.001  |
|     |                 | Outside of migration | 11:53                     | 0.272                         | 0.028   |                                                               |         |
|     | B               | During migration     | 02:02                     | 0.476                         | <0.001  | 109.085 (1,50)                                                | <0.001  |
|     |                 | Outside of migration | 12:36                     | 0.479                         | <0.001  |                                                               |         |
|     | C               | During migration     | 07:59                     | 0.426                         | <0.001  | 3.422 (1,98)                                                  | 0.070   |
|     |                 | Outside of migration | 10:31                     | 0.245                         | 0.018   |                                                               |         |
|     | D               | During migration     | 04:05                     | 0.252                         | 0.171   | 4.556 (1,57)                                                  | 0.040   |
|     |                 | Outside of migration | 06:45                     | 0.317                         | 0.002   |                                                               |         |
|     | E               | During migration     | 08:49                     | 0.283                         | 0.022   | 104.195 (1,49)                                                | <0.001  |
|     |                 | Outside of migration | 17:49                     | 0.343                         | 0.028   |                                                               |         |
|     | F               | During migration     | 22:02                     | 0.247                         | 0.05    | 75.286 (1,85)                                                 | <0.001  |
|     |                 | Outside of migration | 09:10                     | 0.42                          | <0.001  |                                                               |         |
|     | G               | During migration     | 02:23                     | 0.341                         | <0.001  | 171.947 (1,94)                                                | <0.001  |
|     |                 | Outside of migration | 14:27                     | 0.351                         | <0.001  |                                                               |         |

**Table S1** Median time of day that the hottest  $T_b$  occurred for each goose displayed alongside a Rayleigh's test for uniform distribution (and associated P value) for within and outside of migration days including all data (A) and only stationary days (B). A Watson Williams's test was used to compare if these distributions differed within and outside of migration.

| Parameter                          | Estimate | Lower CI | Upper CI |
|------------------------------------|----------|----------|----------|
| (Intercept) Sea level – 1,000m     | 40.582   | 40.414   | 40.750   |
| 1,000 m – 2,000 m                  | -0.232   | -0.263   | -0.200   |
| 2,000 m – 3,000 m                  | -0.190   | -0.231   | -0.150   |
| 3,000 m – 4,000 m                  | -0.330   | -0.369   | -0.290   |
| 4,000 m – 5,000 m                  | -0.351   | -0.388   | -0.315   |
| 5,000 m – 6,000 m                  | -0.492   | -0.543   | -0.442   |
| flight stationary                  | -0.297   | -0.341   | -0.253   |
| 1,000 m – 2,000 m:flightstationary | 0.158    | 0.119    | 0.198    |
| 2,000 m – 3,000 m:flightstationary | 0.018    | -0.030   | 0.066    |
| 3,000 m – 4,000 m:flightstationary | 0.277    | 0.226    | 0.327    |
| 4,000 m – 5,000 m:flightstationary | 0.016    | -0.031   | 0.064    |
| 5,000 m – 6,000 m:flightstationary | 0.131    | 0.054    | 0.208    |

**Table S2**  $T_b$  variation across altitude and flight status. Model averaged means (estimate), and 95% confidence intervals (CI) for the fixed effects of altitude bin and flight status. Intercept estimate  $T_b$  varied across geese (extracted random effects value per goose; goose A: 40.66°C, goose B: 40.33°C, goose C: 40.43°C, goose D: 40.71°C, goose E: 40.47°C, goose F: 40.49°C, goose G: 40.98°C).

## Supplementary Figures

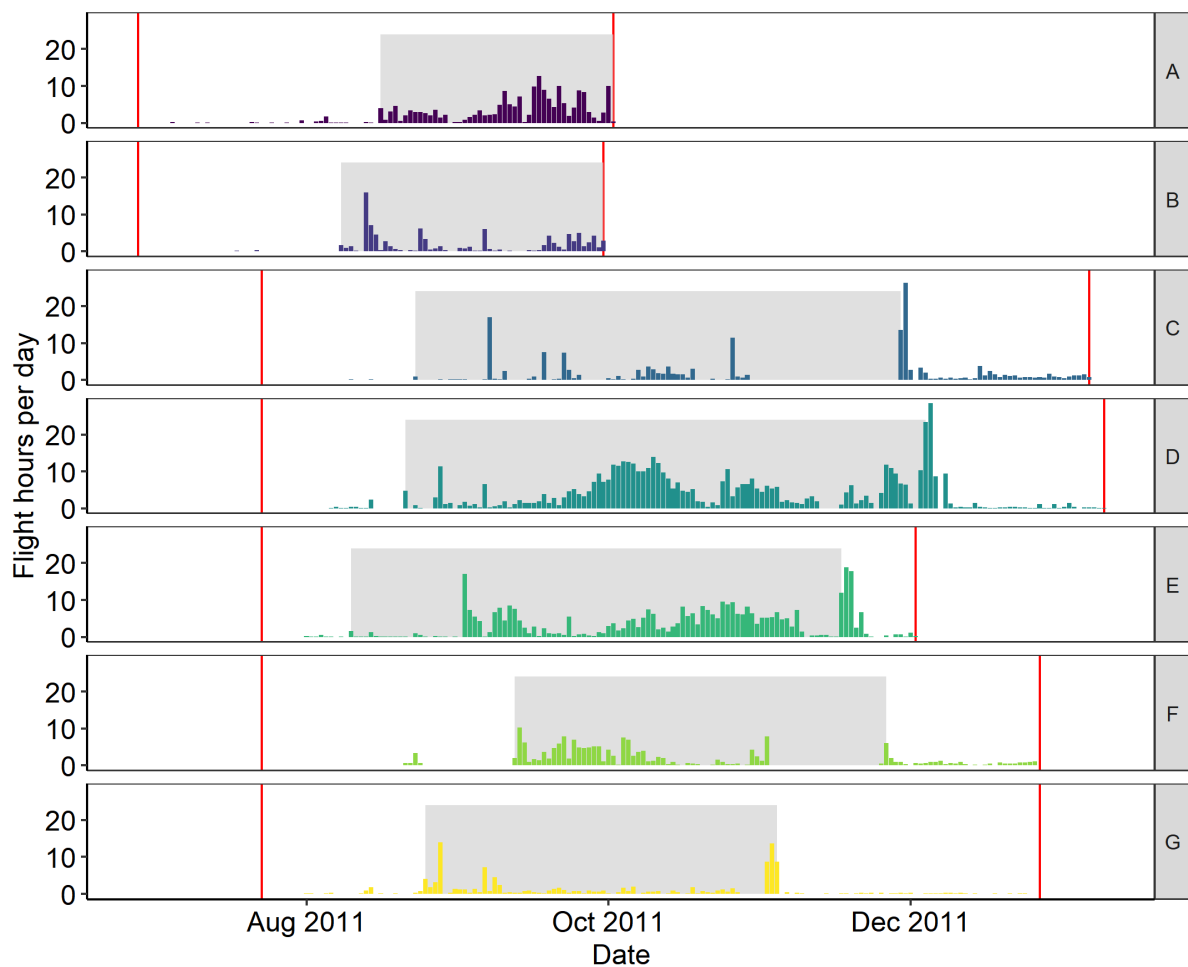

**Fig. S1** Red lines show start and end of tracking period, grey box shows time period classed as migration, and coloured bars show the total number of hours (long or short) spent flying per day.

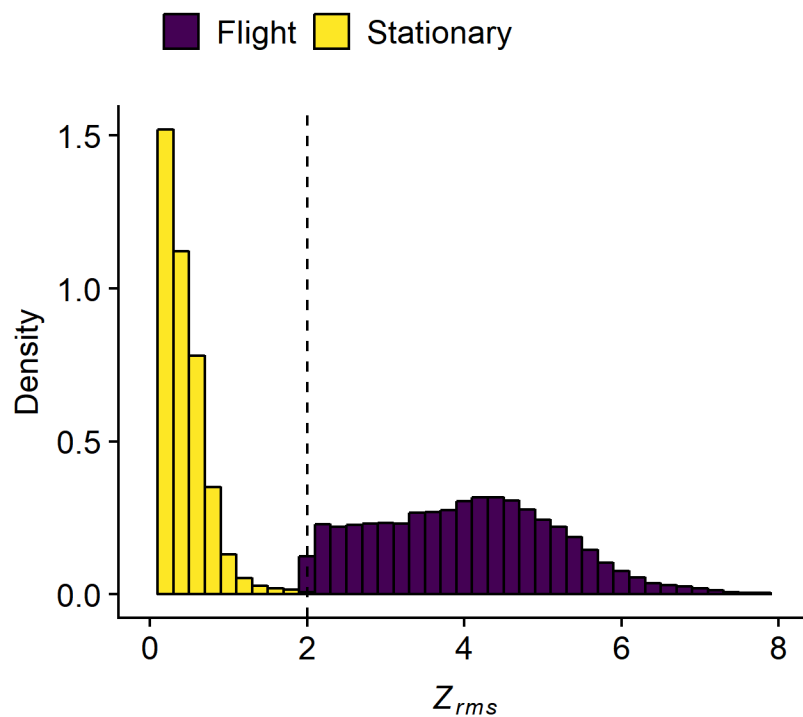

**Fig. S2** Density plot showing the bimodal distribution of  $\ddot{Z}_{rms}$ , dashed vertical line at  $\ddot{Z}_{rms} = 2$  shows the threshold we used to distinguish flight from other stationary and less active periods.

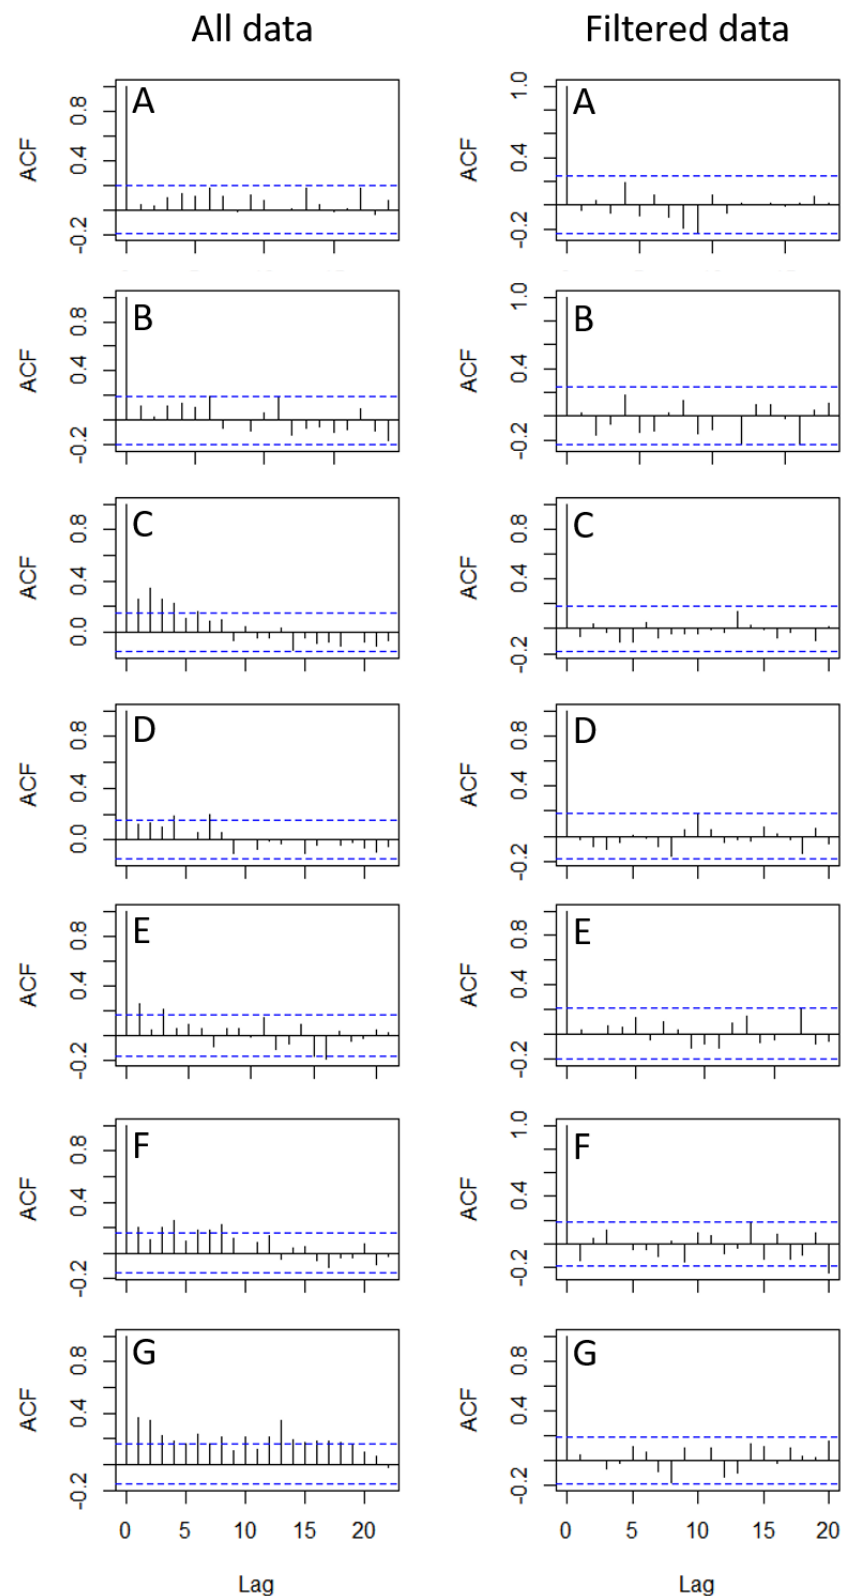

**Fig. S3** ACF plots per goose (A-G) to demonstrate that removing a random 33% of data removed temporal autocorrelation from the time of peak daily  $T_b$  data set. Left hand column shows the full original dataset and right-hand column shows each goose data set once 33% was removed.

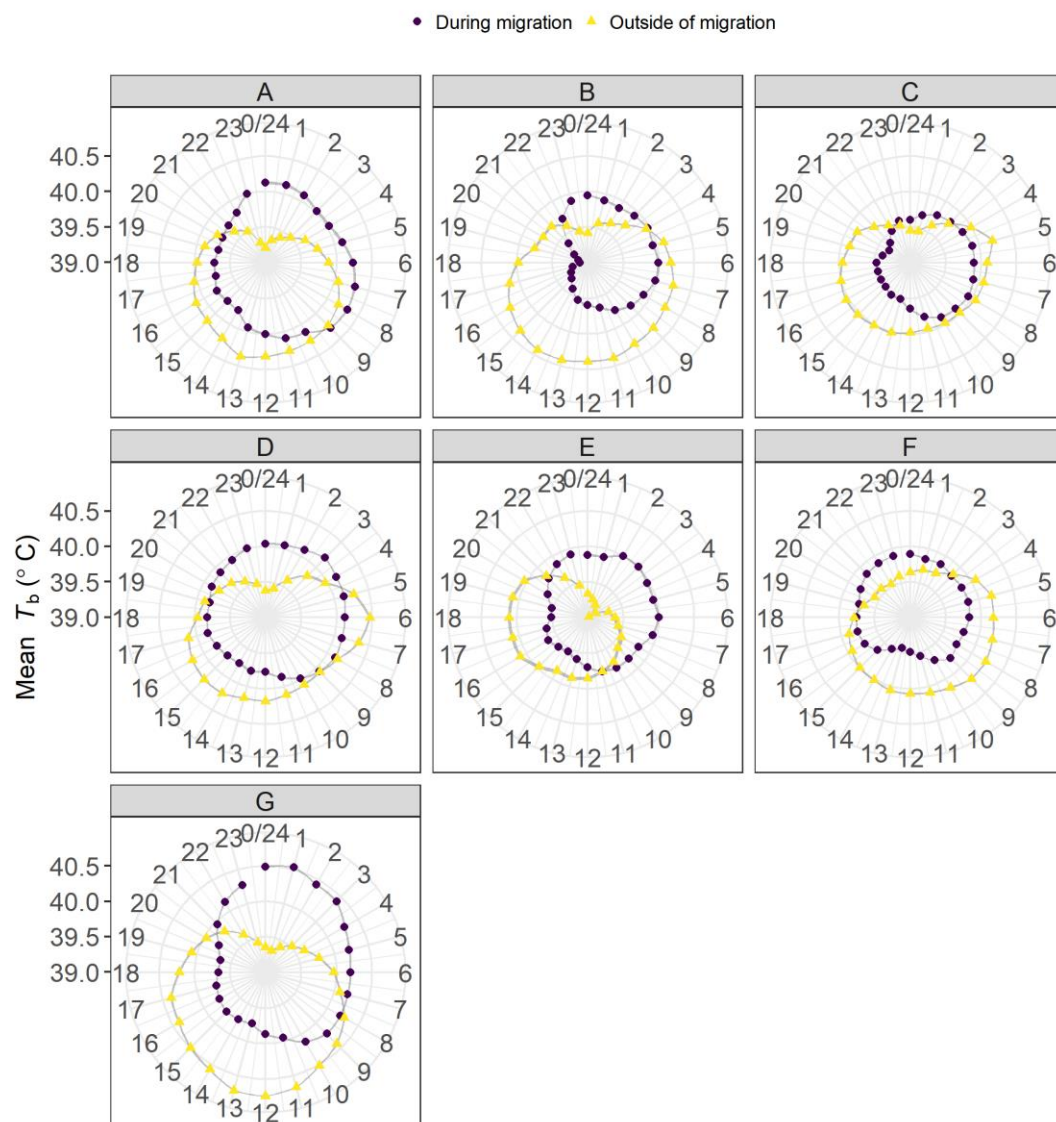

**Fig. S4** Circular plot showing mean ( $\pm$  s.e. as shaded area around the mean) hourly  $T_b$  of five geese during migration (purple) and outside of migration (yellow). Data corrected to local time before plotting.
